# Supplementary material
Source: PubMed Central journal article supplement (PMC2855259)
Supplement: jn.109.119883_1.pdf [file jn.109.119883_1.pdf]

# Supplemental Figure 1

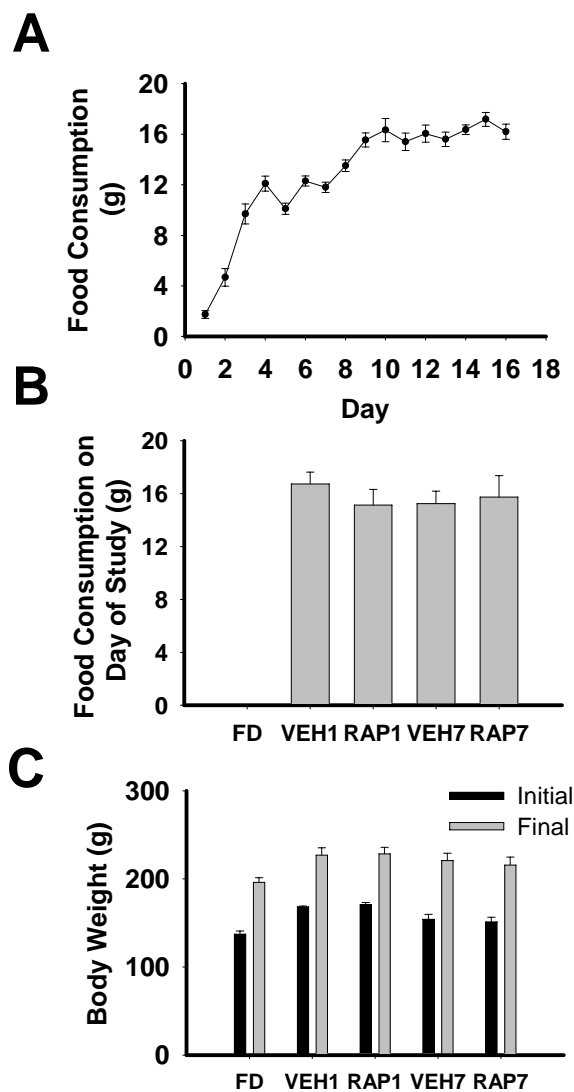

**Supplemental Figure 1.** Food intake and body weight in rats. (A) Food intake over the 16 d adaptation period; (B) food intake on the day of study; (C) body weight prior to the start of the adaptation period (Initial) and on the day of study (Final). FD, feed-deprived; VEH, vehicle-treated rats; RAP, rapamycin-treated rats, 1, 1 h; 7, 7h. Data are reported as the mean  $\pm$  SE for n=10 per group.
