# Supplementary material
Source: PubMed Central journal article supplement (PMC2855259)
Supplement: jn.109.119883_2.pdf [file jn.109.119883_2.pdf]

## Online Supporting Material

Supplemental Table 1. Primer sets for real-time PCR.

| <u>Target Gene</u> | <u>Sequence</u>                                                    |
|--------------------|--------------------------------------------------------------------|
| ACC2               | Forward: CAGGTTCTTCATCCGAGCCATC<br>Reverse: GTTGTTGAACGCCACCTCCAG  |
| ATF4               | Forward: CATCTGTATGAGCCCTGAGTC<br>Reverse: CGAGAACCACGAGGAACACC    |
| Chop               | Forward: CCAGCAGAGGTCACAAGCAC<br>Reverse: CGCACTGACCACTCTGTTTC     |
| DAD1               | Forward: GAACAAGGCGGATTTCCAAGG<br>Reverse: GTCTCCA ACTCCACGGTAAGG  |
| DGAT2              | Forward: GCCATCACCGTCCCTAAGC<br>Reverse: CAGTTCACCTCCAGCACCTCAG    |
| FAS                | Forward: TGCTGCCGTGTCCTTCTACTAC<br>Reverse: CACCCAAGTCCTCGCCGTAG   |
| GRP78              | Forward: AACCCAGATGAGGCTGTAGCA<br>Reverse: ACATCAAGCAGAACCAGGTCAC  |
| GRP94              | Forward: CTGCGTCCTGCTGACCTTC<br>Reverse: CATCGTCTGTCCGTGAGCC       |
| MGAT2              | Forward: CTACACCACCATTCGGAGTTTC<br>Reverse: GCATCTCGGGTCAAGGCTAG   |
| SCD1               | Forward: GTTGGGTGCCTTATCGCTTTCC<br>Reverse: CTCCAGCCAGCCTCTTGTCTAC |
| SREBP1C            | Forward: TGGTGGGCACTGAAGCAAAG<br>Reverse: CACTTCGTAGGGTCAGGTTCTC   |
| SRP54              | Forward: GTCTGCGATTGATCTTGAGGAG<br>Reverse: TGCTTCCCTTAGTCGGTGTC   |
| SRPR               | Forward: TACAGTGCCTGGTAGACAAGTG<br>Reverse: CAGACAGCCTTCACCTTATTGC |

Primer sets were designed by Beacon designer program version 3.1. ACC2, acetyl-CoA carboxylase-2; ATF4, activating transcription factor-4; Chop, CCAAT/enhancer-binding protein homologous protein; DAD1, defender against cell death 1; DGAT2, diacylglycerol acyltransferase-2; FAS, fatty acid synthase; GRP78, glucose regulated protein 78; GRP94, glucose regulated protein 94; MGAT2, mannosyl ( $\alpha$ -1,6-) glycoprotein  $\beta$ -1,2-N-acetylglucosaminyltransferase; SCD1, steroyl-CoA desaturase-1; SREBP1c, sterol regulatory element binding protein 1c; SRP54, signal recognition particle 54; SRPR, signal recognition particle receptor (docking protein).
